# Supplementary material
Source: Research Square preprint supplement (doi:10.21203/rs.3.rs-9202516/v1)
Supplement: Supplementary file 1 [file 9cb7753376259c6b5effe427.docx]

**Supplementary Table S1. Missing data summary for study variables in CHARLS.**

| **Variables** | **NA** |  | **Variables** | **NA** |
| --- | --- | --- | --- | --- |
| Age | 0 |  | Cancer | 5 |
| Sex | 0 |  | CVD | 9 |
| Weight | 3 |  | DM | 0 |
| Height | 10 |  | CES-D score | 0 |
| Waist | 0 |  | Sleep duration | 0 |
| Marital status | 0 |  | Physicalactivity | 21 |
| Education | 0 |  | BMI | 0 |
| Drink | 0 |  | eGFR | 0 |
| Smoke | 0 |  | CKD | 0 |
| TG | 0 |  | Circs2015 | 0 |
| TC | 0 |  | CO | 0 |
| FBG | 0 |  | NO2 | 0 |
| LDL | 0 |  | SO2 | 0 |
| HDL | 0 |  | O3 | 0 |
| HBA1C | 0 |  | PM1 | 0 |
| CRP | 0 |  | PM2.5 | 0 |
| Uric acid | 0 |  | PM10 | 0 |
| Mean SBP | 0 |  | Mean DBP | 0 |

Notes: This table reports the number of missing observations (NA) for each variable included in the baseline characteristics and multivariable logistic regression analyses of long-term air pollution exposure and incident circadian syndrome (CircS). *NA*, missing value; *CHARLS*, China Health and Retirement Longitudinal Study; *CircS*, circadian syndrome; *CES-D*, Center for Epidemiologic Studies Depression Scale; *CVD*, cardiovascular disease; *DM*, diabetes mellitus; *CKD*, chronic kidney disease; *eGFR*, estimated glomerular filtration rate; *CO*, carbon monoxide; *NO₂*, nitrogen dioxide; *SO₂*, sulfur dioxide; *O₃*, ozone; *PM*, particulate matter; *SBP*, systolic blood pressure; *DBP*, diastolic blood pressure.

**Supplementary Table S2. Distribution of long-term ambient air pollutant exposures in CHARLS**

| **Air pollutant** | **Min** | **P25** | **P50** | **P75** | **Max** | **Mean** | **SD** |
| --- | --- | --- | --- | --- | --- | --- | --- |
| CO (mg/m3) | 0.54 | 0.91 | 1.02 | 1.31 | 1.99 | 1.13 | 0.32 |
| SO2 (μg/m3) | 8.74 | 19.10 | 24.10 | 35.00 | 63.10 | 28.60 | 13.20 |
| NO2 (μg/m3) | 14.30 | 21.60 | 27.30 | 36.10 | 48.60 | 29.10 | 9.55 |
| O3 (μg/m3) | 69.80 | 80.30 | 84.00 | 89.40 | 99.40 | 85.30 | 6.29 |
| PM1 (μg/m3) | 11.00 | 22.40 | 29.30 | 36.90 | 52.30 | 30.30 | 9.67 |
| PM2.5 (μg/m3) | 22.10 | 38.10 | 52.20 | 66.90 | 92.30 | 54.10 | 18.00 |
| PM10 (μg/m3) | 42.80 | 60.60 | 90.40 | 110.00 | 248.00 | 91.50 | 32.10 |

**Notes:** This table summarizes the distributions of residential long-term exposure concentrations for each pollutant (CO, SO₂, NO₂, O₃, PM₁, PM₂.₅, and PM₁₀) used in the main analyses. Exposure estimates were obtained from the China High Air Pollutants (CHAP) dataset and linked to participants’ residential locations, and are presented as minimum (Min), 25th percentile (P25), median (P50), 75th percentile (P75), maximum (Max), mean, and standard deviation (SD) with the units shown. *CHARLS*, China Health and Retirement Longitudinal Study; *CHAP*, China High Air Pollutants; *CO*, carbon monoxide; *NO₂*, nitrogen dioxide; *SO₂*, sulfur dioxide; *O₃*, ozone; *PM₁*, particulate matter ≤1 μm; *PM₂.₅*, particulate matter ≤2.5 μm; *PM₁₀*, particulate matter ≤10 μm; *SD*, standard deviation.

**Supplementary Table S3. Quantile-specific overall mixture effect estimates for the exposure–response relationship from the Bayesian kernel machine regression (BKMR) model.**

| **Mixture quantile (q)** | **Estimate (posterior mean)** | **Posterior SD** |
| --- | --- | --- |
| 0.10 | -0.20 | 0.06 |
| 0.15 | -0.19 | 0.06 |
| 0.20 | -0.17 | 0.05 |
| 0.25 | -0.15 | 0.04 |
| 0.30 | -0.12 | 0.03 |
| 0.35 | -0.09 | 0.02 |
| 0.40 | -0.06 | 0.02 |
| 0.45 | -0.03 | 0.01 |
| 0.50 | 0.00 | 0.00 |
| 0.55 | 0.02 | 0.01 |
| 0.60 | 0.05 | 0.02 |
| 0.65 | 0.09 | 0.03 |
| 0.70 | 0.14 | 0.04 |
| 0.75 | 0.16 | 0.05 |
| 0.80 | 0.19 | 0.06 |
| 0.85 | 0.14 | 0.07 |
| 0.90 | 0.03 | 0.08 |

**Notes:** Mixture quantile (q) denotes the percentile of the joint air-pollution mixture, with all mixture components set simultaneously to the same percentile. Estimate (posterior mean) is the BKMR posterior mean of the overall mixture effect on the log-odds of incident CircS relative to q = 0.50 (reference; estimate = 0), and Posterior SD is the corresponding posterior standard deviation. Positive estimates indicate higher odds of incident CircS at higher overall mixture levels. Models included CO, NO₂, SO₂, O₃, and particulate matter (PM₁, PM₂.₅, PM₁₀) and were adjusted for age, sex, ethnicity, education, household income, smoking, drinking, physical activity, BMI, hypertension, diabetes, and dyslipidemia.

**Supplementary Table S4. Group-level and conditional posterior inclusion probabilities (PIPs) of air pollutants in BKMR model.**

| **Pollutant** | **Group** | **Group-level PIP** | **Conditional PIP** |
| --- | --- | --- | --- |
| CO | 1 | 0.22 | 1.00 |
| NO2 | 2 | 0.65 | 1.00 |
| SO2 | 3 | 0.77 | 1.00 |
| O3 | 4 | 0.90 | 1.00 |
| PM1 | 5 | 0.53 | 0.44 |
| PM2.5 | 5 | 0.53 | 0.22 |
| PM10 | 5 | 0.53 | 0.35 |

**Notes:** Group denotes the hierarchical grouping used for variable selection (PM₁/PM₂.₅/PM₁₀ were grouped as particulate matter). Group-level PIP is the posterior probability that the pollutant group is included in the model, and Conditional PIP (given group) is the posterior probability that an individual pollutant is included conditional on its group being included; higher values indicate greater importance in the mixture–CircS association. Covariate adjustment followed the fully adjusted main model. BKMR, Bayesian kernel machine regression; *PIP*, posterior inclusion probability; *CircS*, circadian syndrome; *CO*, carbon monoxide; *NO₂*, nitrogen dioxide; *SO₂*, sulfur dioxide; *O₃*, ozone; *PM*, particulate matter.

**Supplementary Table S5. Overall air-pollutant mixture effect on incident CircS estimated using quantile g-computation (qgcomp).**

| **Term** | **Estimate** | **SE** | **Lower 95% CI** | **Upper 95% CI** | **Z value** | ***P* value** |
| --- | --- | --- | --- | --- | --- | --- |
| (Intercept) | -1.54 | 0.07 | -1.68 | -1.40 | -21.45 | <0.001 |
| Overall mixture effect (ψ) | 0.13 | 0.04 | 0.05 | 0.21 | 3.06 | 0.002 |

**Notes:** Estimates are from a qgcomp logistic regression model. Overall mixture effect (ψ) represents the change in log-odds of incident CircS associated with a one-quantile simultaneous increase in all pollutants in the mixture. SE denotes standard error; 95% CIs and P values were obtained using Wald tests. Covariates were adjusted as in the fully adjusted main model.
